# Supplementary material
Source: Springer Nature journal article supplement (https://www.springermedizin.de/resource/supplementary/12885_2012_3637_MOESM6_ESM.pdf/9463958)

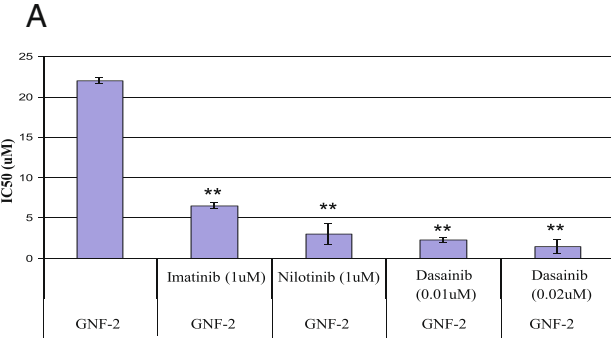

**B**

| Treatment          | % of viable cells |
|--------------------|-------------------|
| Untreated          |                   |
| Imatinib (1uM)     | 97.8 ± 4.22       |
| Nilotinib (1uM)    | 93.6 ± 2.11       |
| Dasatinib (0.01uM) | 94.2 ± 4.22       |
| Dasatinib (0.02uM) | 88.4 ± 1.05       |

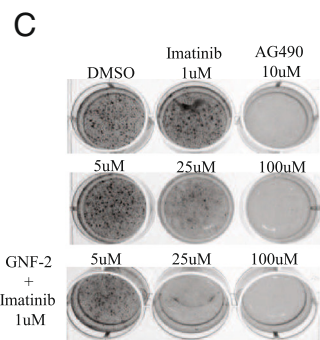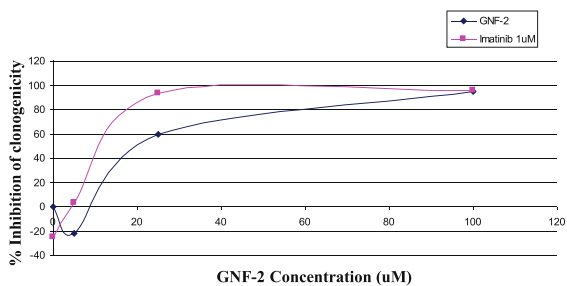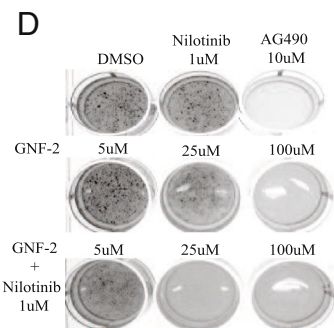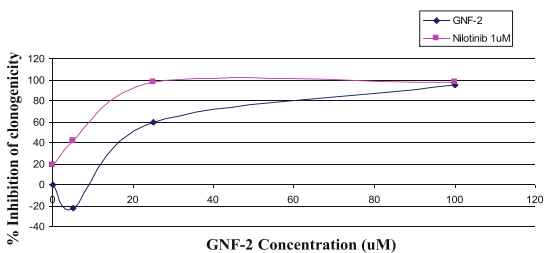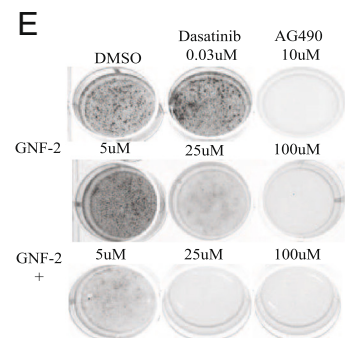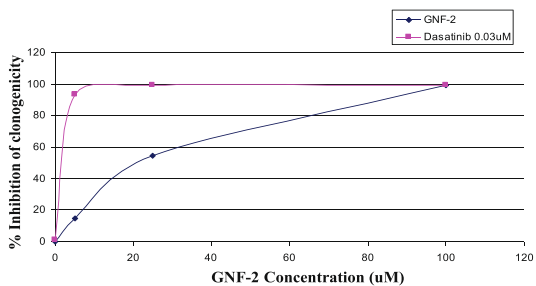

Supplement: MOESM6 [file 9463958]
